# Supplementary material for: Nanoassembly routes stimulate conflicting antibody quantity and quality for transmission-blocking malaria vaccines
Source: PubMed Central journal article supplement (PMC5476561; doi:10.1038/s41598-017-03798-3), 2017-06-19
Supplement: 41598_2017_3798_MOESM1_ESM.pdf [file 41598_2017_3798_MOESM1_ESM.pdf]

# Title: Nanoassembly routes stimulate conflicting antibody quantity and quality for transmission blocking malaria vaccines.

## Supplementary Figures:

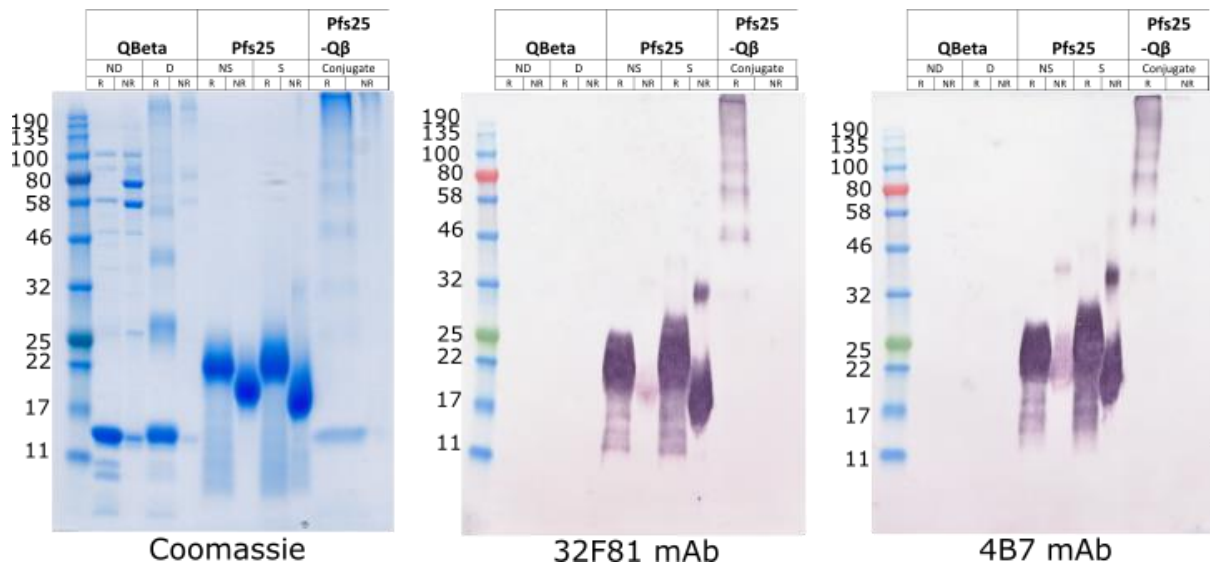

**Figure S1. SDS-PAGE and western blot analysis of chemical modification and conjugation of Pfs25 and Q $\beta$ .** Coomassie stained reducing (R) and non-reducing (NR) SDS-PAGE of pre- (ND) and post-derivatisation (D) Q $\beta$  coat protein, pre- (NS) and post-sulphydryl addition (S) Pfs25 and conjugated (conjugate) Pfs25-Q $\beta$ . Western blot analysis of the same samples was performed using both conformational, transmission blocking mAbs 4B7 and 32F81. Numbers on the left of each panel indicate size markers in kDa.

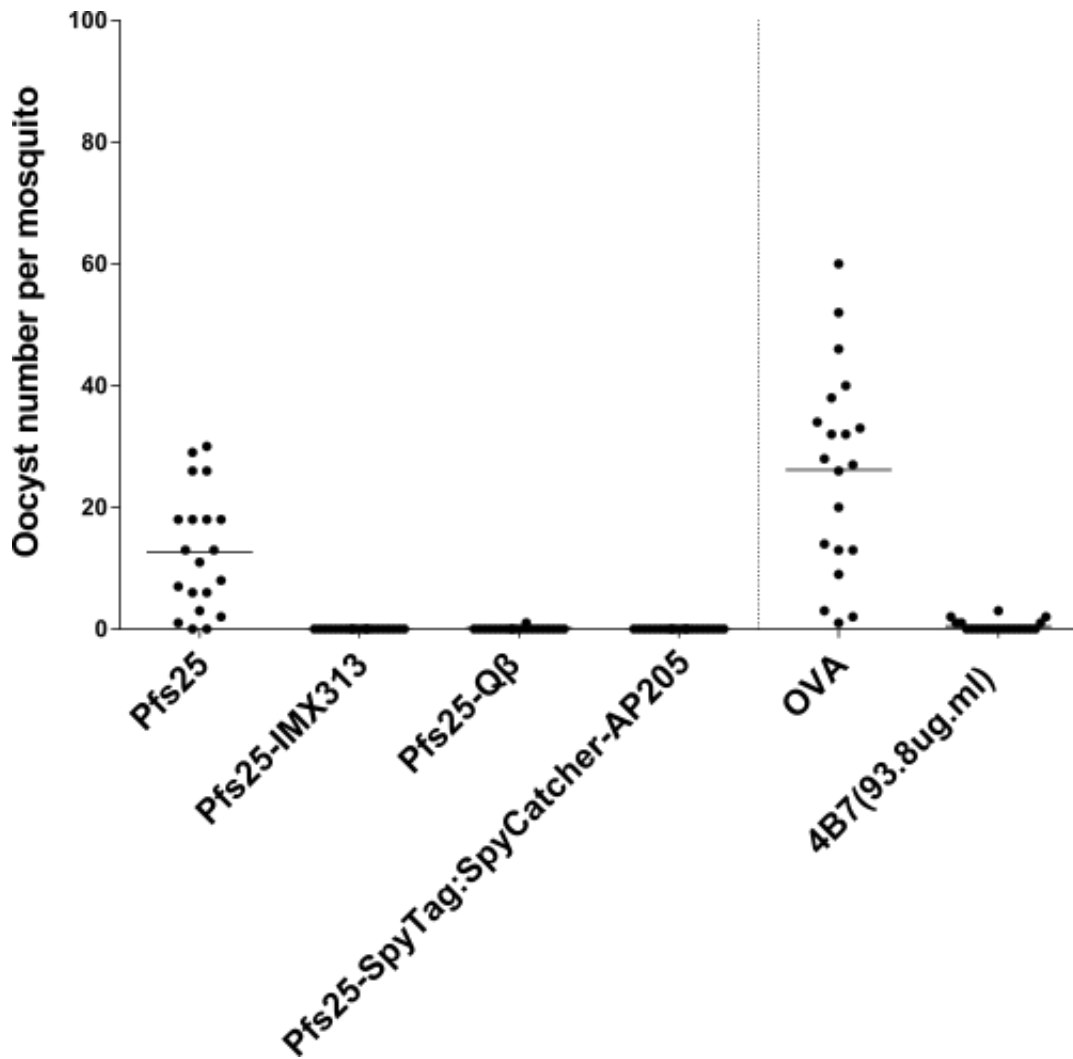

**Figure S2. Transmission blocking efficacy of anti-Pfs25 IgG induced by nanoparticle vaccines.**

Total IgG was purified from the pooled serum of each group (3 weeks post boost). The purified IgG was mixed with *P. falciparum* NF54 cultured gametocytes and fed to *A. stephensi* mosquitoes (n = 20 per test group). IgG from ovalbumin immunized mice was used as a negative control, the transmission blocking anti-Pfs25 mAb 4B7 was used as a positive control. Midguts were dissected 7 days post-feeding. Data points represent the number of oocysts in individual mosquitoes and the lines show the arithmetic mean. All samples were tested at 750  $\mu$ g/ml total IgG unless otherwise indicated.
